# Supplementary material for: Synthesis and extraction studies with a rationally designed diamide ligand selective to actinide(iv) pertinent to the plutonium uranium redox extraction process
Source: Royal Society of Chemistry journal article supplement (doi:10.1039/c6dt00748a), 2016-01-01
Supplement: c6dt00748a1.pdf [file c6dt00748a1.pdf]

## Supporting Informations

### Table of content

|                                                                                 | Page |
|---------------------------------------------------------------------------------|------|
| <b>Distribution ratios for U(VI) at different acidities</b>                     | 2    |
| <b>Synthesis of <i>exo</i>-3,6-epoxy-1,2,3,6-tetrahydrophthalic anhydride 2</b> | 2    |
| <b>Synthesis of <i>exo</i>-3,6-epoxy-hexahydrophthalic anhydride 7</b>          | 2    |
| <b>Fig. S1</b> <sup>1</sup> H NMR spectrum of D-A adduct <b>3</b> .             | 3    |
| <b>Fig. S2</b> <sup>13</sup> C NMR spectrum of D-A adduct <b>3</b> .            | 4    |
| <b>Fig. S3</b> <sup>1</sup> H NMR spectrum of imide <b>4a</b> .                 | 5    |
| <b>Fig. S4</b> <sup>13</sup> C NMR spectrum of imide <b>4a</b> .                | 6    |
| <b>Fig. S5</b> <sup>1</sup> H NMR spectrum of imide <b>4b</b> .                 | 7    |
| <b>Fig. S6</b> <sup>13</sup> C NMR spectrum of imide <b>4b</b> .                | 8    |
| <b>Fig. S7</b> <sup>1</sup> H NMR spectrum of OTDA <b>1a</b> .                  | 9    |
| <b>Fig. S8</b> <sup>1</sup> H NMR spectrum of OTDA <b>1b</b> .                  | 10   |
| <b>Fig. S9</b> <sup>1</sup> H NMR spectrum of imide <b>6a</b> .                 | 11   |
| <b>Fig. S10</b> <sup>13</sup> C NMR spectrum of imide <b>6a</b> .               | 12   |
| <b>Fig. S11</b> <sup>1</sup> H NMR spectrum of imide <b>6b</b> .                | 13   |
| <b>Fig. S12</b> <sup>13</sup> C NMR spectrum of imide <b>6b</b> .               | 14   |
| <b>Fig. S13</b> <sup>1</sup> H NMR spectrum of imide <b>6c</b> .                | 15   |
| <b>Fig. S14</b> <sup>13</sup> C NMR spectrum of imide <b>6c</b> .               | 16   |

### Distribution ratios for U(VI) at different acidities:

Distribution ratio ( $D$ ) for U(VI) was also checked at different feed  $\text{HNO}_3$  concentrations (Table S1). The  $D$  value for U(VI) was found to be very low even in 6 M  $\text{HNO}_3$ .

**Table S1.** Distribution ratios for U(VI) at different acidities.

| S.No. | [ $\text{HNO}_3$ ], M | $D_U$ |
|-------|-----------------------|-------|
| 1.    | 1                     | 0.2   |
| 2.    | 3                     | 0.35  |
| 3.    | 4                     | 0.4   |
| 4.    | 6                     | 0.6   |

### Synthesis of *exo*-3,6-epoxy-1,2,3,6-tetrahydrophthalic anhydride **2**

A freshly distilled furan (11 mL, 151.5 mmol) was added to a stirred solution of maleic anhydride (14.7 g, 150 mmol) in dry THF (45 mL) at room temperature. The reaction mixture was left standing for 5 days. The resulting crystals were filtered to obtain anhydride **2** (21 g, 84%). M.P. 116-118 °C.  $^1\text{H}$  NMR (200 MHz,  $\text{CDCl}_3$ ):  $\delta$  3.17 (2 H, s, COCHCHCO), 5.46 (2 H, s, CHOCH), 6.58 (2 H, s, CH=CH).

### Synthesis of *exo*-3,6-epoxy-hexahydrophthalic anhydride **7**

Palladium on charcoal (400 mg, 10% Pd) was added to a solution of unsaturated anhydride **2** (4 g, 24.0 mmol) in dry ethyl acetate (72 mL). The mixture was degassed and flushed with hydrogen gas for several times followed by stirring under hydrogen atmosphere for 24 h. The mixture was filtered through celite and the filtrate was evaporated to give the saturated anhydride **7** (3.97 g, 98%). M.P. 112 °C.  $^1\text{H}$  NMR (300 MHz,  $\text{CDCl}_3$ ):  $\delta$  1.57-1.62 (2 H, m,  $2 \times \text{CH}_A\text{H}_B$ ), 1.85-1.95 (2 H, m,  $2 \times \text{CH}_A\text{H}_B$ ), 3.18 (2 H, s,  $2 \times \text{CHCO}$ ), 5.03-5.05 (2 H, m, CHOCH).

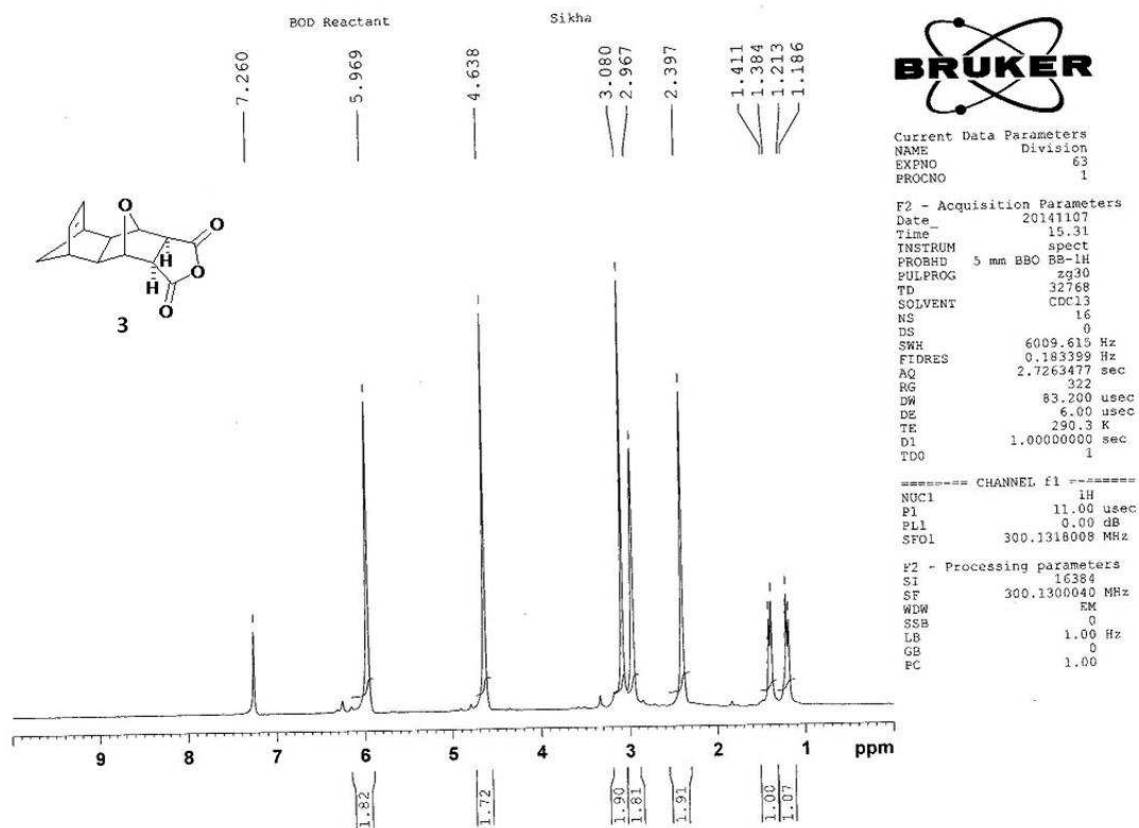

Fig. S1 <sup>1</sup>H NMR spectrum of D-A adduct 3.

anhydride adduct  
 C13CPD CDC13\_E:\RS BARC MOD

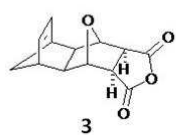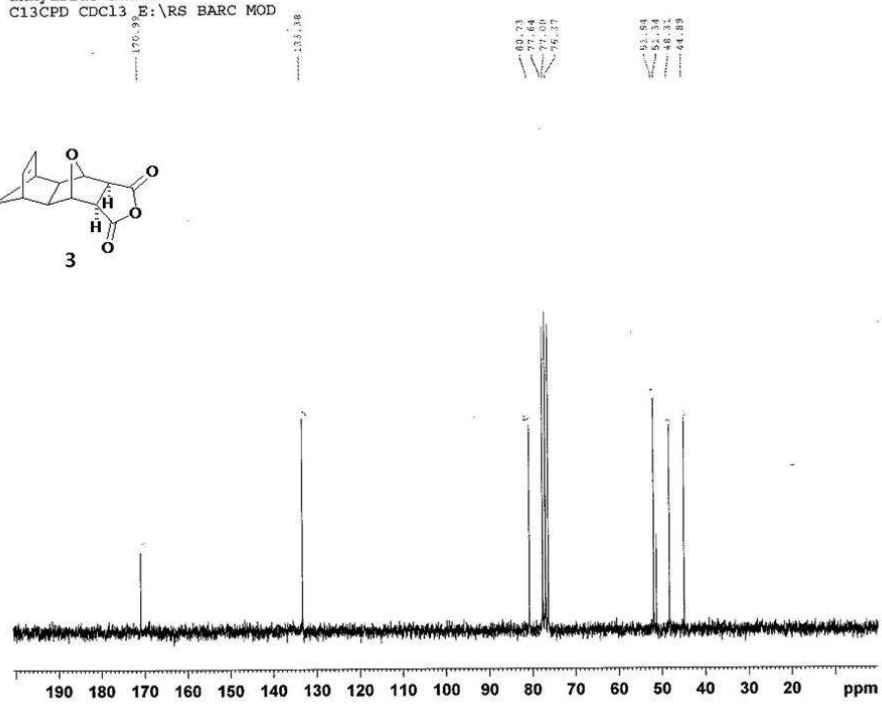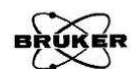

```

Current Data Parameters
NAME          adducta
EXPNO         12
PROCNO        1

F2 - Acquisition Parameters
Date_         20150225
Time          15:53
INSTRUM       spect
PROBHD        5 mm BBO
PULPROG       zgpg30
TD            65536
SOLVENT       CDC13
NS            751
DS            4
SWH           12019.230 Hz
FIDRES        0.182399 Hz
AQ            2.7264877 sec
RG            3.68
DM            41.620 usec
DE            6.50 usec
TE            300.2 K
DQ            2.0000000 sec
DL1           0.0300000 sec

***** CHANNEL f1 *****
NUC1           13C
P1            8.00 usec
PEAK          48.6000000 MHz
SF01          50.3177019 MHz

***** CHANNEL f2 *****
CPROG         wa2fz2
NUC2           13C
PCPD2         38.00 usec
PAC2          13.5000000 MHz
PLAC2         0.1164000 MHz
PAC3          0.1754000 MHz
SF02          100.6254004 MHz

F2 - Processing parameters
SI            32768
SF           50.3177019 MHz
WDW           EM
SSB           0
LB            1.00 MHz
GB            0
CB            0
PC            1.40
  
```

Fig. S2 <sup>13</sup>C NMR spectrum of D-A adduct 3.

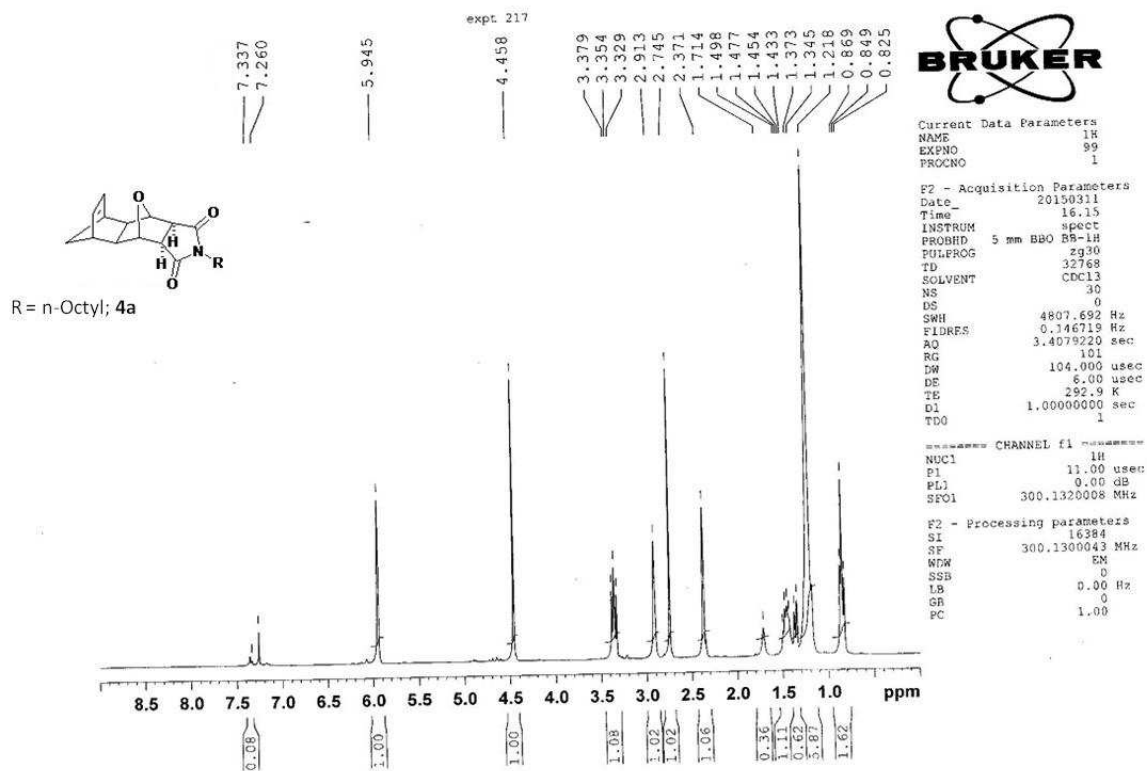

Fig. S3 <sup>1</sup>H NMR spectrum of imide 4a.

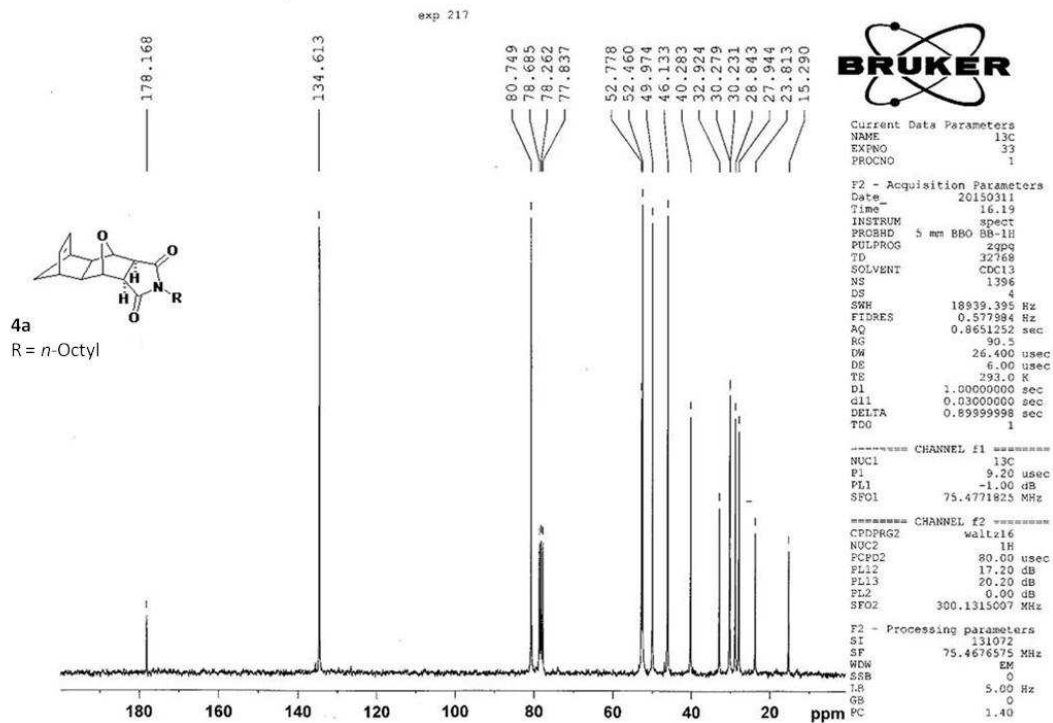

**Fig. S4**  $^{13}\text{C}$  NMR spectrum of imide **4a**. (The reported data were corrected considering  $\delta$  value of  $\text{CDCl}_3$  central line at 77.0 ppm )

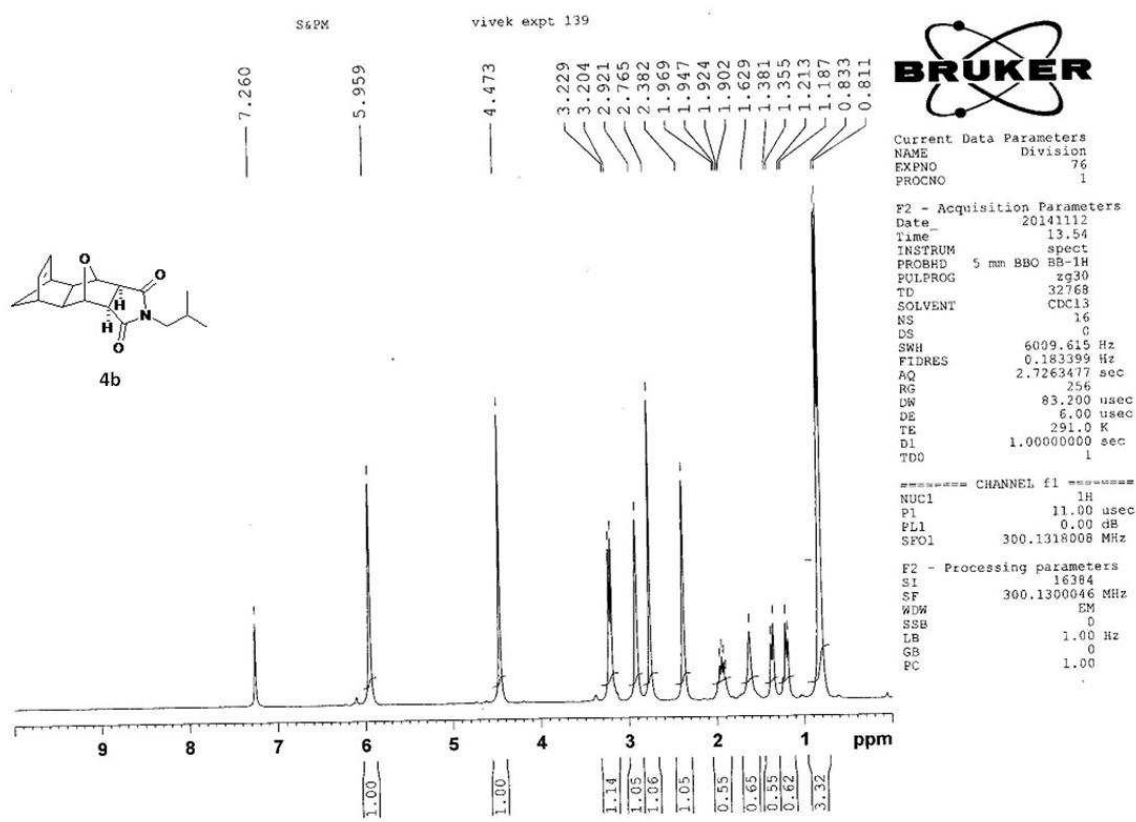

**Fig. S5** <sup>1</sup>H NMR spectrum of imide **4b**.

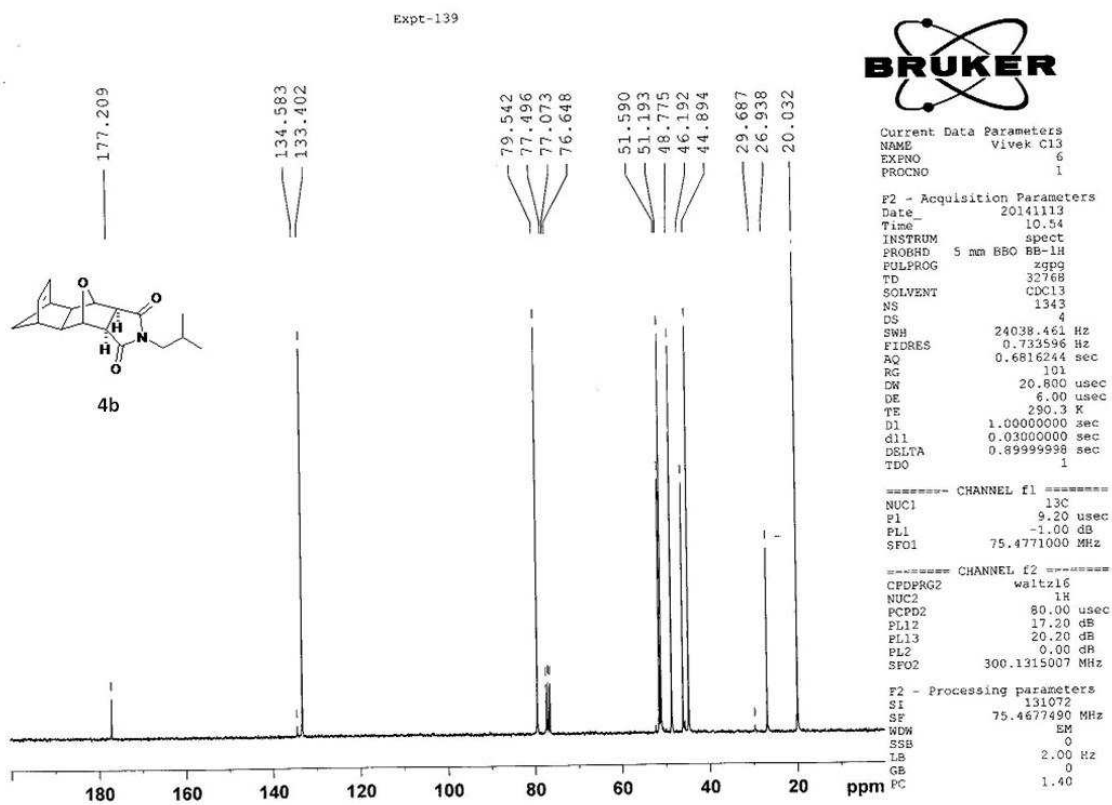

**Fig. S6**  $^{13}\text{C}$  NMR spectrum of imide **4b**.



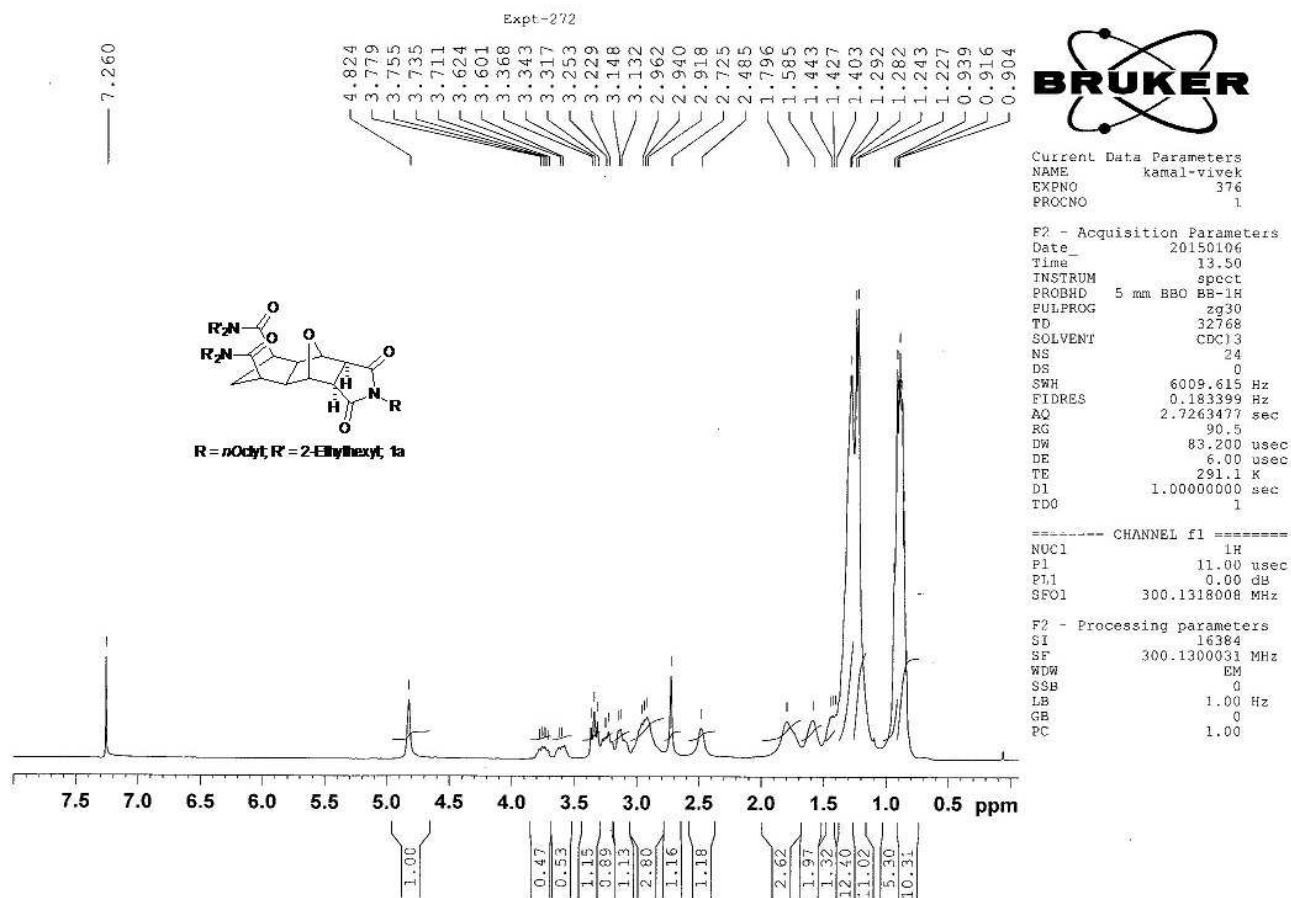

Fig. S7 <sup>1</sup>H NMR spectrum of OTDA 1a.

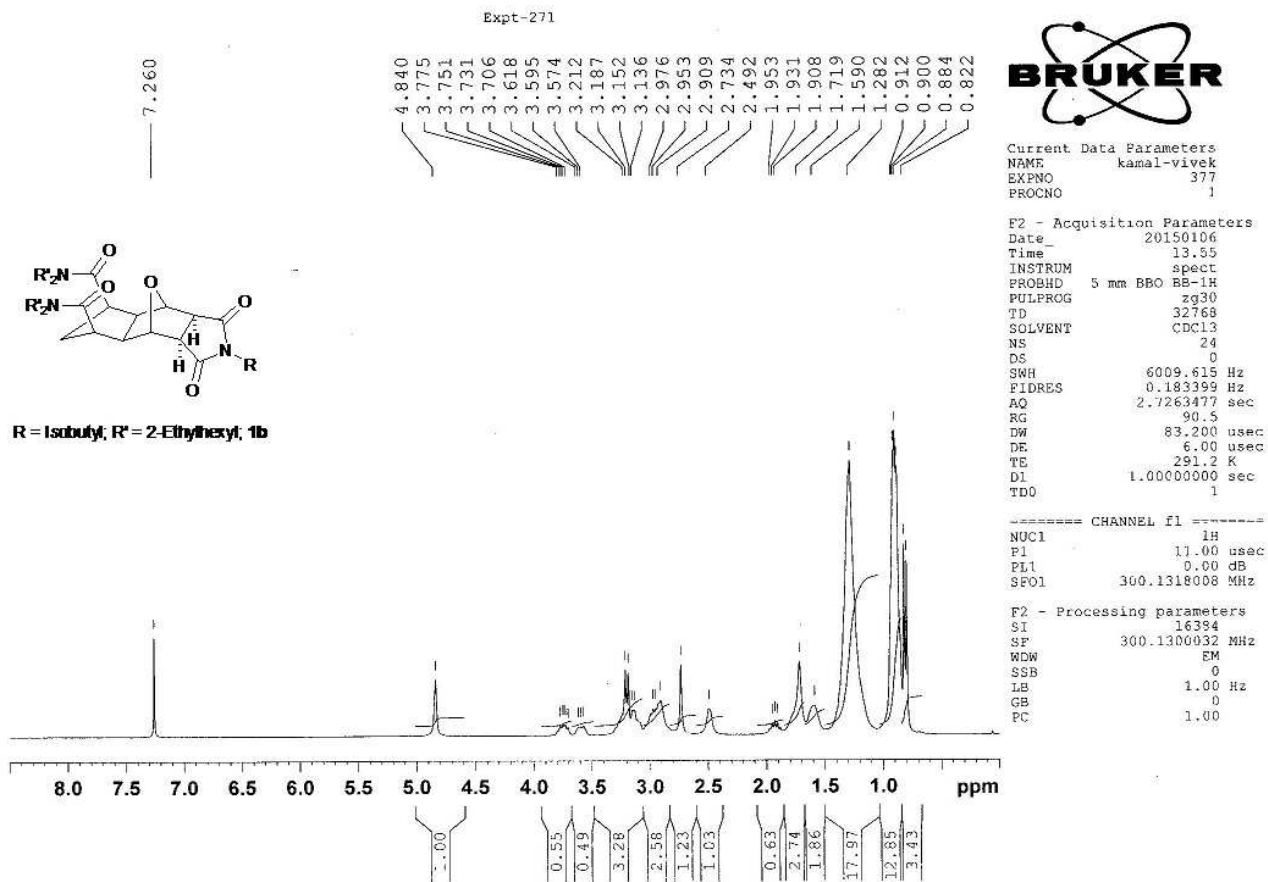

**Fig. S8**  $^1\text{H}$  NMR spectrum of OTDA **1b**.

imide isobutyl  
PROTON CDCl3 E:\RS BARC MOD

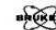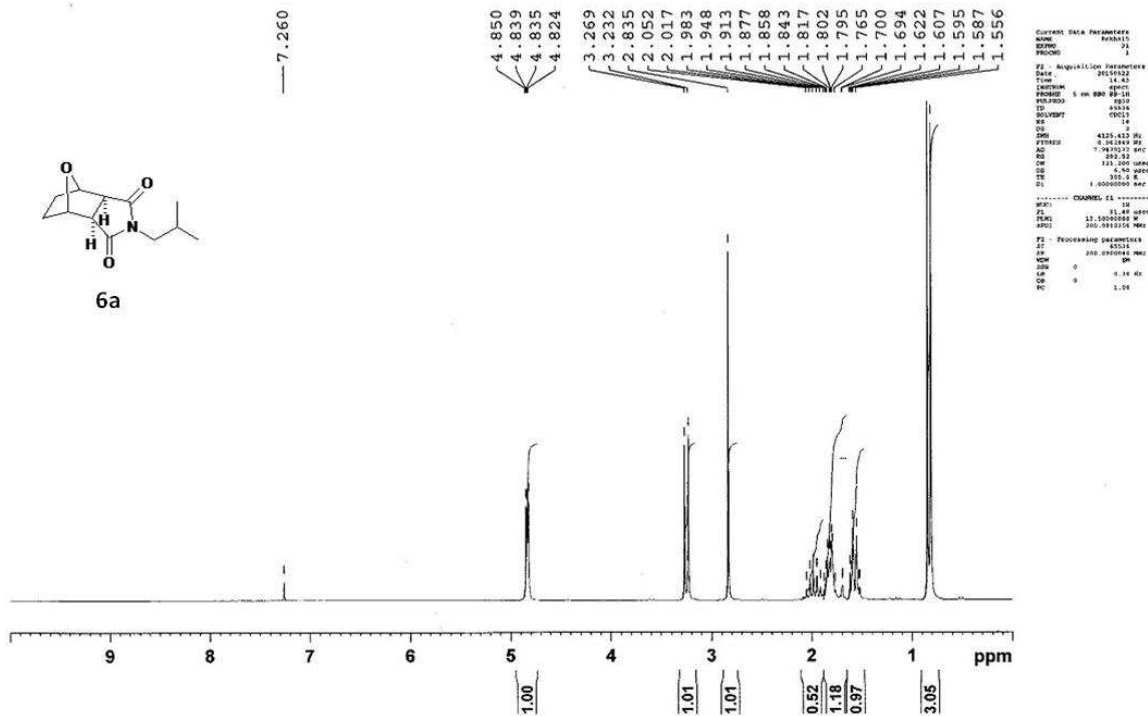

Fig. S9 <sup>1</sup>H NMR spectrum of imide 6a.

imide isobutyl  
C13CPD CDCl3 E:\RS BARC MOD

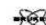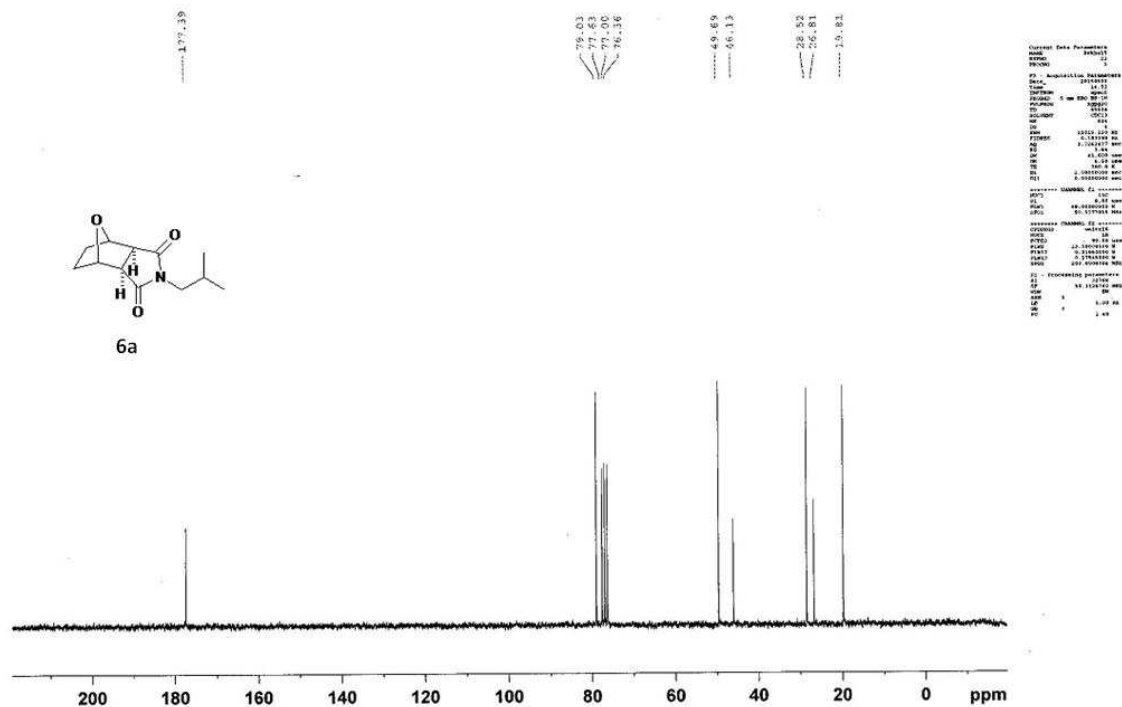

Fig. S10 <sup>13</sup>C NMR spectrum of imide 6a.

2EH-emide  
 PROTON CDCl3 E:\RC BARC MOD

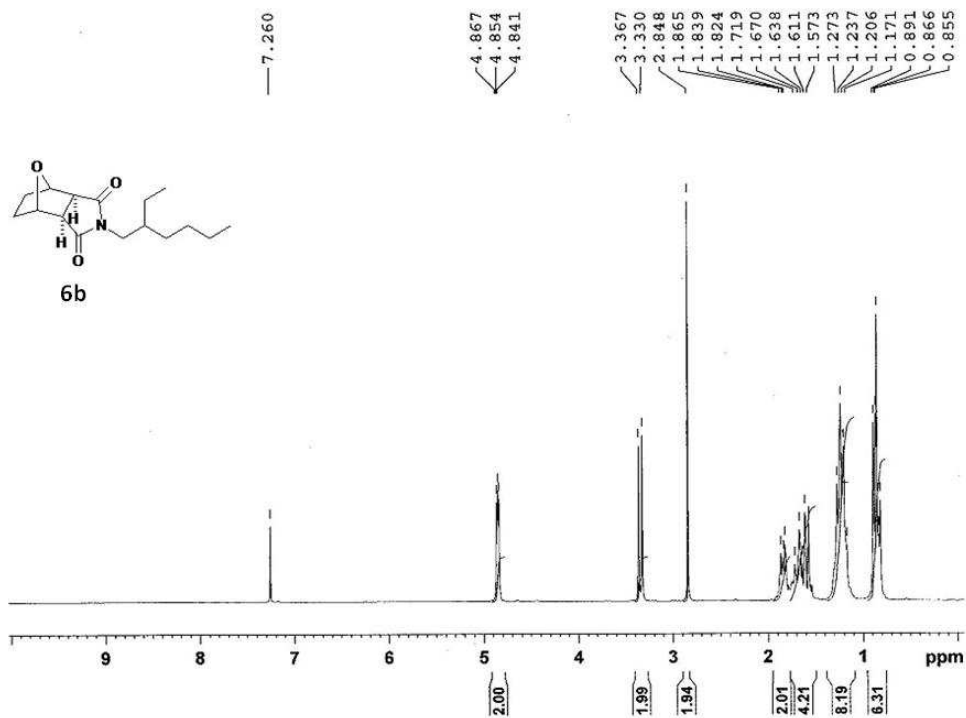

**BRUKER**

```

NAME          2EH-emide
EXPNO         1
PROCNO        1
PROCRES       1
F2 - Acquisition Parameters
Date_         20080222
Time         11.28
INSTRUM       spect
PROBHD        5 mm BBO BB-1H
PULPROG       zgpg30
TD            65536
SOLVENT       CDCl3
NS           14
DS           4
SWH           4129.612 Hz
FIDRES        0.342449 Hz
AQ            0.7451516 sec
RG            202.52
AQ           114.000000 sec
DE            1.0000000 sec
TE            300.2 K
SI            1.0000000 sec

***** CHANNEL f2 *****
NUC1           1H
P1            12.00
PL1           0.0000000 dB
PL12          19.0000000 dB
PL13          19.0000000 dB
PL14          19.0000000 dB
PL15          19.0000000 dB
PL16          19.0000000 dB
PL17          19.0000000 dB
PL18          19.0000000 dB
PL19          19.0000000 dB
PL20          19.0000000 dB
PL21          19.0000000 dB
PL22          19.0000000 dB
PL23          19.0000000 dB
PL24          19.0000000 dB
PL25          19.0000000 dB
PL26          19.0000000 dB
PL27          19.0000000 dB
PL28          19.0000000 dB
PL29          19.0000000 dB
PL30          19.0000000 dB
PL31          19.0000000 dB
PL32          19.0000000 dB
PL33          19.0000000 dB
PL34          19.0000000 dB
PL35          19.0000000 dB
PL36          19.0000000 dB
PL37          19.0000000 dB
PL38          19.0000000 dB
PL39          19.0000000 dB
PL40          19.0000000 dB
PL41          19.0000000 dB
PL42          19.0000000 dB
PL43          19.0000000 dB
PL44          19.0000000 dB
PL45          19.0000000 dB
PL46          19.0000000 dB
PL47          19.0000000 dB
PL48          19.0000000 dB
PL49          19.0000000 dB
PL50          19.0000000 dB
PL51          19.0000000 dB
PL52          19.0000000 dB
PL53          19.0000000 dB
PL54          19.0000000 dB
PL55          19.0000000 dB
PL56          19.0000000 dB
PL57          19.0000000 dB
PL58          19.0000000 dB
PL59          19.0000000 dB
PL60          19.0000000 dB
PL61          19.0000000 dB
PL62          19.0000000 dB
PL63          19.0000000 dB
PL64          19.0000000 dB
PL65          19.0000000 dB
PL66          19.0000000 dB
PL67          19.0000000 dB
PL68          19.0000000 dB
PL69          19.0000000 dB
PL70          19.0000000 dB
PL71          19.0000000 dB
PL72          19.0000000 dB
PL73          19.0000000 dB
PL74          19.0000000 dB
PL75          19.0000000 dB
PL76          19.0000000 dB
PL77          19.0000000 dB
PL78          19.0000000 dB
PL79          19.0000000 dB
PL80          19.0000000 dB
PL81          19.0000000 dB
PL82          19.0000000 dB
PL83          19.0000000 dB
PL84          19.0000000 dB
PL85          19.0000000 dB
PL86          19.0000000 dB
PL87          19.0000000 dB
PL88          19.0000000 dB
PL89          19.0000000 dB
PL90          19.0000000 dB
PL91          19.0000000 dB
PL92          19.0000000 dB
PL93          19.0000000 dB
PL94          19.0000000 dB
PL95          19.0000000 dB
PL96          19.0000000 dB
PL97          19.0000000 dB
PL98          19.0000000 dB
PL99          19.0000000 dB
PL100         19.0000000 dB

```

Fig. S11 <sup>1</sup>H NMR spectrum of imide **6b**.

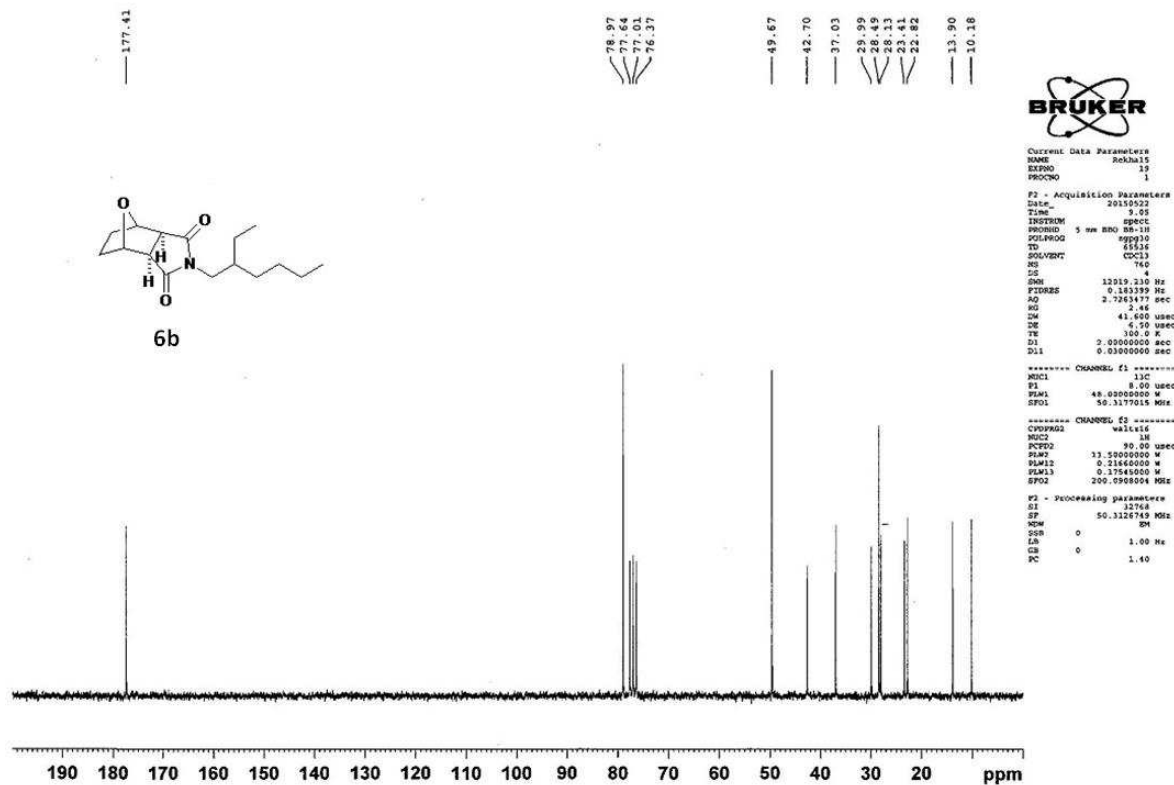

Fig. S12  $^{13}\text{C}$  NMR spectrum of imide **6b**.

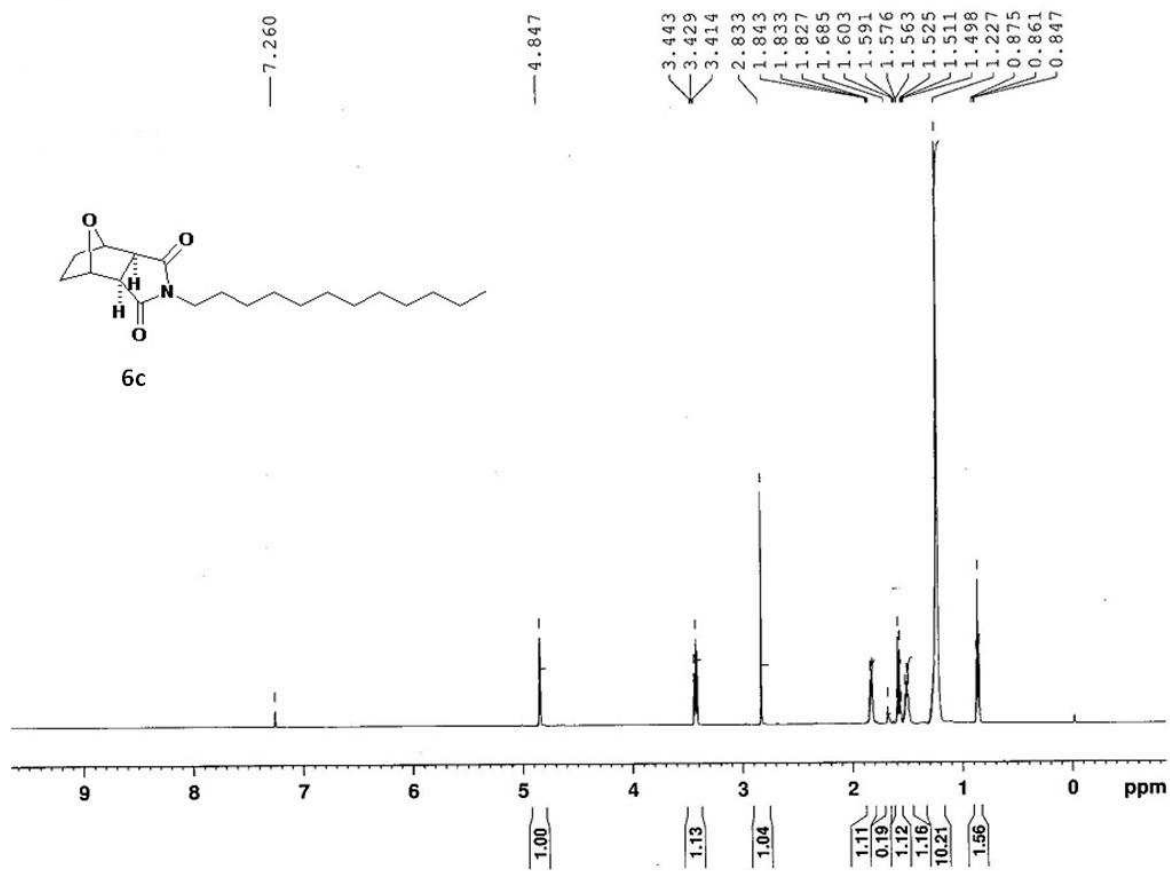

Fig. S13  $^1\text{H}$  NMR spectrum of imide **6c**.
